# Supplementary material for: Growing recyclable and healable piezoelectric composites in 3D printed bioinspired structure for protective wearable sensor
Source: PubMed Central journal article supplement (PMC10576793; doi:10.1038/s41467-023-41740-6), 2023-10-14
Supplement: 41467_2023_41740_MOESM2_ESM.pdf [file 41467_2023_41740_MOESM2_ESM.pdf]

## **Description of Additional Supplementary Files**

File Name: Supplementary Movie 1

Description: 3D-printed-RSC smart knee pad test.
