# Supplementary material for: Growing recyclable and healable piezoelectric composites in 3D printed bioinspired structure for protective wearable sensor
Source: PubMed Central journal article supplement (PMC10576793; doi:10.1038/s41467-023-41740-6), 2023-10-14
Supplement: 41467_2023_41740_MOESM4_ESM.pdf [file 41467_2023_41740_MOESM4_ESM.pdf]

## Reporting Summary

Nature Portfolio wishes to improve the reproducibility of the work that we publish. This form provides structure for consistency and transparency in reporting. For further information on Nature Portfolio policies, see our [Editorial Policies](#) and the [Editorial Policy Checklist](#).

### Statistics

For all statistical analyses, confirm that the following items are present in the figure legend, table legend, main text, or Methods section.

n/a Confirmed

- |                                     |                                     |                                                                                                                                                                                                                                                            |
|-------------------------------------|-------------------------------------|------------------------------------------------------------------------------------------------------------------------------------------------------------------------------------------------------------------------------------------------------------|
| <input type="checkbox"/>            | <input checked="" type="checkbox"/> | The exact sample size ( $n$ ) for each experimental group/condition, given as a discrete number and unit of measurement                                                                                                                                    |
| <input type="checkbox"/>            | <input checked="" type="checkbox"/> | A statement on whether measurements were taken from distinct samples or whether the same sample was measured repeatedly                                                                                                                                    |
| <input checked="" type="checkbox"/> | <input type="checkbox"/>            | The statistical test(s) used AND whether they are one- or two-sided<br><i>Only common tests should be described solely by name; describe more complex techniques in the Methods section.</i>                                                               |
| <input checked="" type="checkbox"/> | <input type="checkbox"/>            | A description of all covariates tested                                                                                                                                                                                                                     |
| <input checked="" type="checkbox"/> | <input type="checkbox"/>            | A description of any assumptions or corrections, such as tests of normality and adjustment for multiple comparisons                                                                                                                                        |
| <input type="checkbox"/>            | <input checked="" type="checkbox"/> | A full description of the statistical parameters including central tendency (e.g. means) or other basic estimates (e.g. regression coefficient) AND variation (e.g. standard deviation) or associated estimates of uncertainty (e.g. confidence intervals) |
| <input checked="" type="checkbox"/> | <input type="checkbox"/>            | For null hypothesis testing, the test statistic (e.g. $F$ , $t$ , $r$ ) with confidence intervals, effect sizes, degrees of freedom and $P$ value noted<br><i>Give <math>P</math> values as exact values whenever suitable.</i>                            |
| <input checked="" type="checkbox"/> | <input type="checkbox"/>            | For Bayesian analysis, information on the choice of priors and Markov chain Monte Carlo settings                                                                                                                                                           |
| <input checked="" type="checkbox"/> | <input type="checkbox"/>            | For hierarchical and complex designs, identification of the appropriate level for tests and full reporting of outcomes                                                                                                                                     |
| <input checked="" type="checkbox"/> | <input type="checkbox"/>            | Estimates of effect sizes (e.g. Cohen's $d$ , Pearson's $r$ ), indicating how they were calculated                                                                                                                                                         |

*Our web collection on [statistics for biologists](#) contains articles on many of the points above.*

### Software and code

Policy information about [availability of computer code](#)

Data collection

We collected the experimental data using Analog Discovery 2 (Digilent 410-321, Digilent Co. WA, USA), universal testing machine (Instron 345C-1, MA, USA), d33 meter (YE2730A, APC International, Ltd., Mackeyville, PA, USA), and vibrometer (Polytec MSA-500 Micro System Analyzer, Germany).

Data analysis

We analyzed the data using MATLAB 2021a and COMSOL Multiphysics 6.0.

For manuscripts utilizing custom algorithms or software that are central to the research but not yet described in published literature, software must be made available to editors and reviewers. We strongly encourage code deposition in a community repository (e.g. GitHub). See the Nature Portfolio [guidelines for submitting code & software](#) for further information.

### Data

Policy information about [availability of data](#)

All manuscripts must include a [data availability statement](#). This statement should provide the following information, where applicable:

- Accession codes, unique identifiers, or web links for publicly available datasets
- A description of any restrictions on data availability
- For clinical datasets or third party data, please ensure that the statement adheres to our [policy](#)

The dataset that supports the plots within this paper and other findings of this study are available from the corresponding author upon reasonable request.

## Research involving human participants, their data, or biological material

Policy information about studies with [human participants or human data](#). See also policy information about [sex, gender \(identity/presentation\), and sexual orientation](#) and [race, ethnicity and racism](#).

|                                                                    |                                                                                          |
|--------------------------------------------------------------------|------------------------------------------------------------------------------------------|
| Reporting on sex and gender                                        | <input type="text" value="No human research participants were involved in this study."/> |
| Reporting on race, ethnicity, or other socially relevant groupings | <input type="text" value="No human research participants were involved in this study."/> |
| Population characteristics                                         | <input type="text" value="No human research participants were involved in this study."/> |
| Recruitment                                                        | <input type="text" value="No human research participants were involved in this study."/> |
| Ethics oversight                                                   | <input type="text" value="No human research participants were involved in this study."/> |

Note that full information on the approval of the study protocol must also be provided in the manuscript.

## Field-specific reporting

Please select the one below that is the best fit for your research. If you are not sure, read the appropriate sections before making your selection.

Life sciences       Behavioural & social sciences       Ecological, evolutionary & environmental sciences

For a reference copy of the document with all sections, see [nature.com/documents/nr-reporting-summary-flat.pdf](https://www.nature.com/documents/nr-reporting-summary-flat.pdf)

## Life sciences study design

All studies must disclose on these points even when the disclosure is negative.

|                 |                                                                                       |
|-----------------|---------------------------------------------------------------------------------------|
| Sample size     | <input type="text" value="In this study, no life sciences researches were involved"/> |
| Data exclusions | <input type="text" value="In this study, no life sciences researches were involved"/> |
| Replication     | <input type="text" value="In this study, no life sciences researches were involved"/> |
| Randomization   | <input type="text" value="In this study, no life sciences researches were involved"/> |
| Blinding        | <input type="text" value="In this study, no life sciences researches were involved"/> |

## Behavioural & social sciences study design

All studies must disclose on these points even when the disclosure is negative.

|                   |                                                                                                            |
|-------------------|------------------------------------------------------------------------------------------------------------|
| Study description | <input type="text" value="In this study, no behavioural &amp; social sciences researches were involved."/> |
| Research sample   | <input type="text" value="In this study, no behavioural &amp; social sciences researches were involved."/> |
| Sampling strategy | <input type="text" value="In this study, no behavioural &amp; social sciences researches were involved."/> |
| Data collection   | <input type="text" value="In this study, no behavioural &amp; social sciences researches were involved."/> |
| Timing            | <input type="text" value="In this study, no behavioural &amp; social sciences researches were involved."/> |
| Data exclusions   | <input type="text" value="In this study, no behavioural &amp; social sciences researches were involved."/> |
| Non-participation | <input type="text" value="In this study, no behavioural &amp; social sciences researches were involved."/> |
| Randomization     | <input type="text" value="In this study, no behavioural &amp; social sciences researches were involved."/> |

# Ecological, evolutionary & environmental sciences study design

All studies must disclose on these points even when the disclosure is negative.

|                          |                                                                                                                            |
|--------------------------|----------------------------------------------------------------------------------------------------------------------------|
| Study description        | <input type="text" value="In this study, no ecological, evolutionary &amp; environmental sciences studies were involved"/> |
| Research sample          | <input type="text" value="In this study, no ecological, evolutionary &amp; environmental sciences studies were involved"/> |
| Sampling strategy        | <input type="text" value="In this study, no ecological, evolutionary &amp; environmental sciences studies were involved"/> |
| Data collection          | <input type="text" value="In this study, no ecological, evolutionary &amp; environmental sciences studies were involved"/> |
| Timing and spatial scale | <input type="text" value="In this study, no ecological, evolutionary &amp; environmental sciences studies were involved"/> |
| Data exclusions          | <input type="text" value="In this study, no ecological, evolutionary &amp; environmental sciences studies were involved"/> |
| Reproducibility          | <input type="text" value="In this study, no ecological, evolutionary &amp; environmental sciences studies were involved"/> |
| Randomization            | <input type="text" value="In this study, no ecological, evolutionary &amp; environmental sciences studies were involved"/> |
| Blinding                 | <input type="text" value="In this study, no ecological, evolutionary &amp; environmental sciences studies were involved"/> |

Did the study involve field work?  Yes  No

## Reporting for specific materials, systems and methods

We require information from authors about some types of materials, experimental systems and methods used in many studies. Here, indicate whether each material, system or method listed is relevant to your study. If you are not sure if a list item applies to your research, read the appropriate section before selecting a response.

### Materials & experimental systems

### Methods

- | n/a                                 | Involvement              | Material/System               |
|-------------------------------------|--------------------------|-------------------------------|
| <input checked="" type="checkbox"/> | <input type="checkbox"/> | Antibodies                    |
| <input checked="" type="checkbox"/> | <input type="checkbox"/> | Eukaryotic cell lines         |
| <input checked="" type="checkbox"/> | <input type="checkbox"/> | Palaeontology and archaeology |
| <input checked="" type="checkbox"/> | <input type="checkbox"/> | Animals and other organisms   |
| <input checked="" type="checkbox"/> | <input type="checkbox"/> | Clinical data                 |
| <input checked="" type="checkbox"/> | <input type="checkbox"/> | Dual use research of concern  |
| <input checked="" type="checkbox"/> | <input type="checkbox"/> | Plants                        |

- | n/a                                 | Involvement              | Method                 |
|-------------------------------------|--------------------------|------------------------|
| <input checked="" type="checkbox"/> | <input type="checkbox"/> | ChIP-seq               |
| <input checked="" type="checkbox"/> | <input type="checkbox"/> | Flow cytometry         |
| <input checked="" type="checkbox"/> | <input type="checkbox"/> | MRI-based neuroimaging |
